# Supplementary material
Source: PubMed Central journal article supplement (PMC11071950)
Supplement: 18_2022_4161_MOESM1_ESM.pdf [file 18_2022_4161_MOESM1_ESM.pdf]

## Supplementary Information

### Late-stage rescue of visually guided behavior in the context of a significantly remodeled retinitis pigmentosa mouse model

Cellular and Molecular Life Sciences

Jacqueline Kajtna<sup>1,2</sup>, Stephen H. Tsang<sup>3,4</sup>, Susanne F. Koch<sup>1,2\*</sup>

<sup>1</sup>Department of Pharmacy, Center for Drug Research, Ludwig-Maximilians-Universität München, Munich, Germany.

<sup>2</sup>Physiological Genomics, BioMedical Center, Ludwig-Maximilians-Universität München, Planegg/Martinsried, Germany.

<sup>3</sup>Jonas Children's Vision Care, Columbia Stem Cell Initiative, Departments of Ophthalmology, Pathology & Cell Biology, Institute of Human Nutrition, Vagelos College of Physicians and Surgeons, Columbia University, New York, New York, 10032, USA.

<sup>4</sup>Edward S. Harkness Eye Institute, New York-Presbyterian Hospital, New York, New York, 10032, USA.

\*Correspondence to Susanne F. Koch; Email: [susanne.koch@cup.uni-muenchen.de](mailto:susanne.koch@cup.uni-muenchen.de)

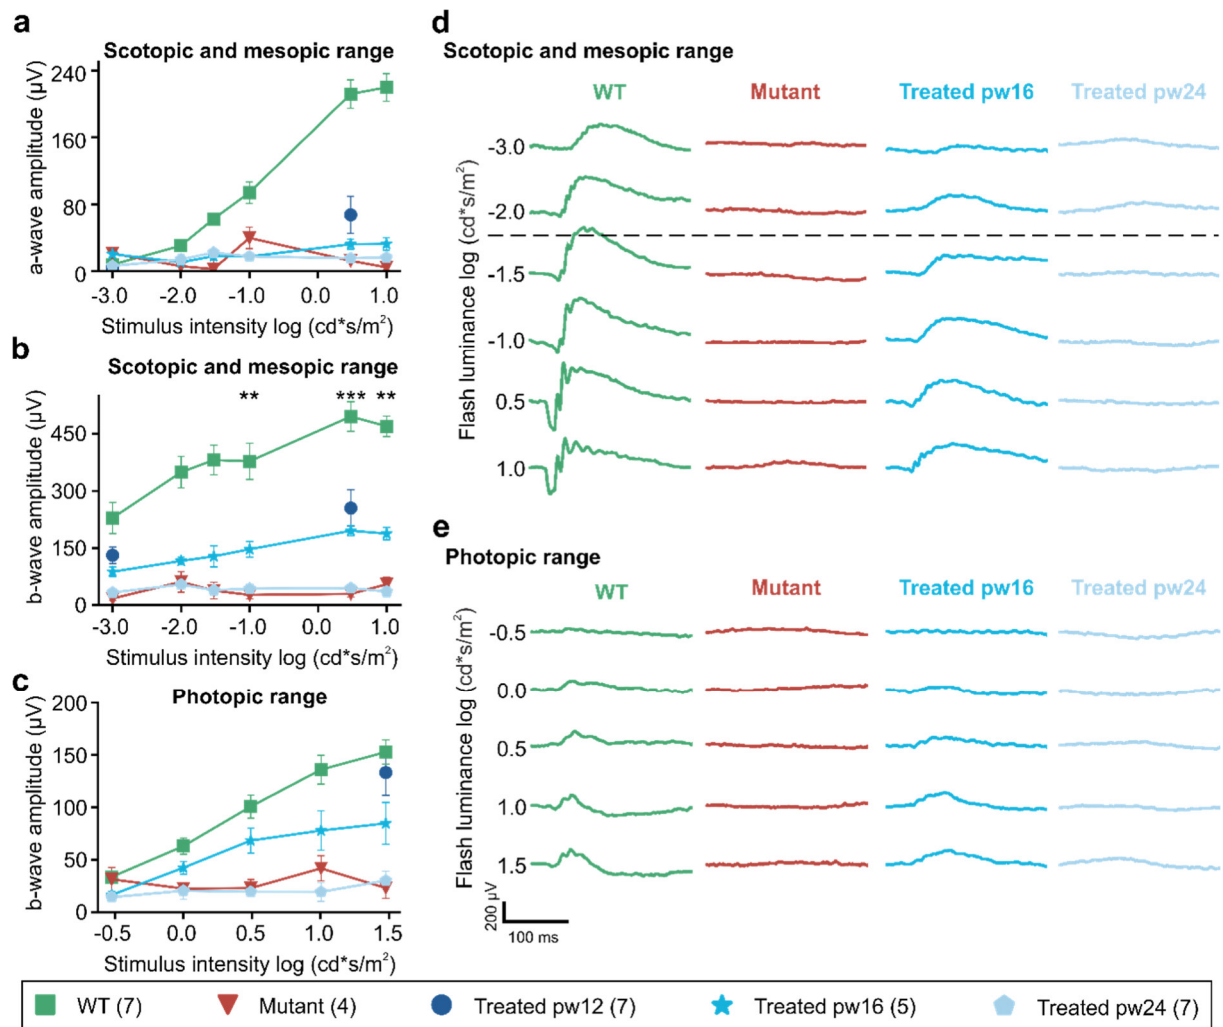

**Fig. S1 Rescue of retinal function after treatment at 12 or 16 weeks of age, but not at 24 weeks** *Pde6b*<sup>STOP/STOP</sup> mice were treated (or not) at pw12, pw16 or pw24, and full-field single-flash ERGs recorded at pw40. **(a,b)** Scotopic and mesopic a-wave and b-wave amplitudes. **(c)** Photopic b-wave amplitudes. Data represent the mean  $\pm$  SEM; Tukey's test for multiple comparisons. \*\*  $P \leq .01$ ; \*\*\*  $P \leq .001$ . Asterisks, significant differences between mutant and treated at pw16. No statistical difference was found between animals treated at pw24 and mutant. N values, indicated in legend next to each group. Representative responses from a single retina in the **(d)** scotopic and mesopic range, and **(e)** in the photopic range. Dashed line, border between scotopic (above) and mesopic ranges (below).

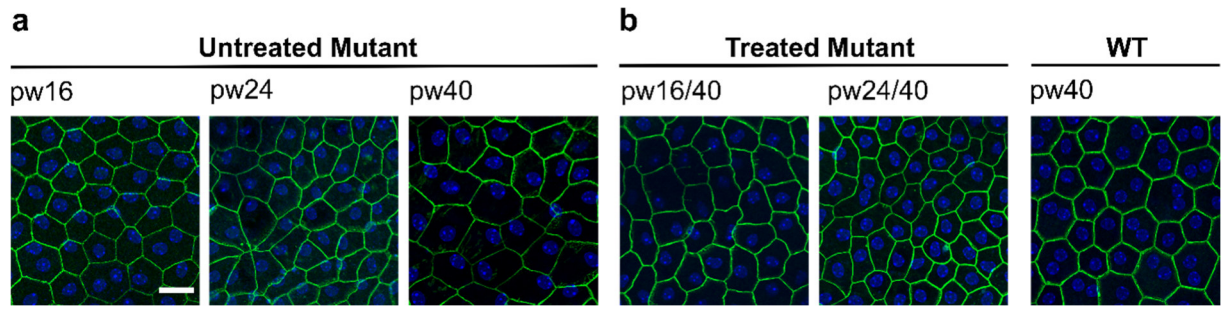

**Fig. S2 Minor morphological abnormalities of the peripheral RPE  $Pde6b^{STOP/STOP}$  mice were sacrificed at 16, 24 or 40 weeks of age.  $Pde6b^{STOP/+}$  mice (WT) and  $Pde6b^{STOP/STOP}$  mice treated at pw16 and pw24 were all sacrificed at pw40. RPE flat-mounts were labeled with an anti- $\beta$ -catenin antibody (green) to visualize a component of adherens junctions. (a) Representative RPE flat-mounts from untreated  $Pde6b^{STOP/STOP}$  mice at 16, 24 and 40 weeks of age and (b) from 40-week-old treated  $Pde6b^{STOP/STOP}$  and  $Pde6b^{STOP/+}$  (WT) mice. Scale bar, 20  $\mu$ m.**
